# Supplementary material for: Reference genes for gene expression studies in the mouse heart
Source: PubMed Central journal article supplement (PMC5428317; doi:10.1038/s41598-017-00043-9), 2017-02-02

## Reference genes for gene expression studies in the mouse heart

Adrián Ruiz-Villalba<sup>1,2†</sup>, Andrea Mattiotti<sup>1†</sup>, Quinn D Gunst<sup>1</sup>, Sara Cano-Ballesteros<sup>3</sup>,  
Maurice J van den Hoff<sup>1</sup>, Jan M Ruijter<sup>1\*</sup>

<sup>1</sup>Department of Anatomy, Embryology and Physiology, Academic Medical Center, Amsterdam, The Netherlands

<sup>2</sup>Cell Therapy, Foundation of Applied Medical Research (FIMA), University of Navarra, Pamplona, Spain

<sup>3</sup>Department of Animal Biology, University of Málaga, Málaga, Spain

†Authors contributed equally

# Supplementary Material

**Supplementary Table 1.**

**Minimum, mean and maximum observed Cq value for each of the candidate reference genes in each of the tissue types.**

| Gene→          | Eef1e1 |      |      | H2afz |      |      | Hpvt1 |      |      | Pgk1 |      |      |
|----------------|--------|------|------|-------|------|------|-------|------|------|------|------|------|
| Tissue Type    | Min    | Mean | Max  | Min   | Mean | Max  | Min   | Mean | Max  | Min  | Mean | Max  |
| 14dBZ          | 24.8   | 25.3 | 26.2 | 21.9  | 22.5 | 23.0 | 22.4  | 22.8 | 23.5 | 22.3 | 22.6 | 22.8 |
| 14dIZ          | 29.7   | 29.7 | 29.7 | 24.6  | 24.6 | 24.6 | 28.3  | 28.3 | 28.3 |      |      |      |
| 3dBZ           | 23.6   | 24.6 | 25.7 | 20.3  | 21.6 | 22.8 | 21.8  | 22.4 | 23.3 | 21.9 | 22.3 | 22.8 |
| 3dIZ           | 27.1   | 27.1 | 27.1 | 23.2  | 23.2 | 23.2 | 25.5  | 25.5 | 25.5 | 24.7 | 24.7 | 24.7 |
| 7dIZ           | 26.0   | 26.0 | 26.0 | 21.5  | 21.5 | 21.5 | 23.2  | 23.2 | 23.2 | 22.9 | 22.9 | 22.9 |
| AdultLA        | 27.2   | 28.3 | 29.3 | 23.3  | 23.5 | 23.6 | 25.2  | 25.3 | 25.5 | 26.5 | 26.5 | 26.5 |
| AdultLV        | 23.1   | 25.5 | 33.2 | 20.2  | 21.2 | 22.4 | 20.3  | 21.2 | 22.4 | 19.6 | 20.1 | 21.2 |
| AdultRA        | 31.3   | 33.1 | 36.3 | 24.8  | 26.0 | 27.2 | 26.1  | 27.2 | 28.4 | 30.2 | 30.8 | 31.4 |
| AdultWH        | 29.1   | 30.0 | 30.8 | 24.8  | 26.0 | 26.8 | 26.8  | 27.2 | 27.7 | 26.7 | 29.0 | 30.7 |
| Atria          | 23.2   | 23.7 | 24.1 |       |      |      | 22.3  | 22.3 | 22.3 | 19.9 | 20.1 | 20.3 |
| e10            | 25.6   | 26.3 | 26.9 | 20.9  | 20.9 | 20.9 | 24.4  | 25.0 | 25.6 | 22.2 | 22.6 | 23.1 |
| e11            | 25.3   | 26.9 | 28.5 | 20.9  | 22.4 | 23.9 | 24.2  | 24.4 | 24.6 | 22.4 | 23.3 | 24.1 |
| e12            | 23.7   | 24.1 | 24.5 | 19.1  | 19.1 | 19.1 | 22.5  | 23.0 | 23.5 | 20.8 | 20.9 | 21.0 |
| e14            | 23.5   | 23.7 | 24.0 | 18.8  | 18.8 | 18.8 | 21.7  | 22.2 | 22.6 | 20.4 | 20.4 | 20.4 |
| e15            | 35.7   | 35.7 | 35.7 | 31.5  | 31.5 | 31.5 | 32.5  | 33.1 | 33.7 | 31.6 | 32.0 | 32.4 |
| e16            | 29.8   | 30.0 | 30.3 | 28.4  | 29.2 | 29.9 | 25.7  | 26.1 | 26.9 | 27.2 | 27.4 | 27.9 |
| e17            | 29.0   | 29.0 | 29.0 | 23.6  | 23.6 | 23.6 | 25.4  | 25.4 | 25.4 | 22.8 | 22.8 | 22.8 |
| e18            | 23.6   | 23.6 | 23.6 | 19.1  | 19.1 | 19.1 | 21.3  | 22.0 | 22.7 | 19.7 | 19.8 | 19.9 |
| HL1            | 27.1   | 27.3 | 27.4 | 22.3  | 22.4 | 22.5 | 23.3  | 23.5 | 23.7 | 20.2 | 20.3 | 20.4 |
| HL1Bmp         | 27.3   | 27.4 | 27.6 | 21.2  | 21.3 | 21.4 | 22.7  | 23.1 | 23.4 | 19.6 | 19.7 | 19.7 |
| HL1Tsa         | 27.7   | 27.7 | 27.7 | 21.7  | 21.7 | 21.7 | 24.1  | 24.1 | 24.1 | 20.7 | 20.7 | 20.7 |
| LVendoHETheart | 24.2   | 24.8 | 25.4 | 21.5  | 21.7 | 21.9 | 21.8  | 22.2 | 22.6 | 19.9 | 20.9 | 21.8 |
| LVendoWTheart  | 23.9   | 25.2 | 26.4 | 20.6  | 22.1 | 23.7 | 21.3  | 22.6 | 23.9 | 20.3 | 21.5 | 22.8 |
| LVepiHETheart  | 24.2   | 24.3 | 24.4 | 21.2  | 21.2 | 21.2 | 21.7  | 21.8 | 21.8 | 20.7 | 20.9 | 21.1 |
| LVepiWTheart   | 24.4   | 25.0 | 25.5 | 21.0  | 21.3 | 21.5 | 21.3  | 21.7 | 22.1 | 19.7 | 20.6 | 21.4 |
| LVmiSham       | 23.4   | 24.0 | 24.5 | 20.9  | 21.4 | 21.9 | 21.5  | 21.7 | 21.9 | 20.5 | 20.5 | 20.6 |
| LVtac          | 24.6   | 25.0 | 25.3 | 22.4  | 22.7 | 22.9 | 22.0  | 22.5 | 22.8 | 20.4 | 20.7 | 20.9 |
| LVtrans        | 25.4   | 25.9 | 26.4 | 23.0  | 23.2 | 23.5 | 23.1  | 23.5 | 23.9 | 21.8 | 21.8 | 21.9 |
| p14WH          | 25.4   | 25.7 | 26.1 | 22.0  | 22.0 | 22.0 | 22.4  | 22.8 | 23.2 | 21.8 | 22.0 | 22.2 |
| P1LA           | 25.2   | 25.2 | 25.2 | 20.3  | 20.3 | 20.3 | 22.1  | 22.1 | 22.1 | 21.0 | 21.0 | 21.0 |
| P1LV           | 29.1   | 29.1 | 29.1 | 23.5  | 23.5 | 23.5 | 26.2  | 26.2 | 26.2 | 26.9 | 26.9 | 26.9 |
| P1RA           | 27.1   | 27.1 | 27.1 | 21.7  | 21.7 | 21.7 | 24.1  | 24.1 | 24.1 | 23.8 | 23.8 | 23.8 |
| P1RV           | 27.9   | 27.9 | 27.9 | 22.3  | 22.3 | 22.3 | 23.2  | 23.2 | 23.2 | 21.7 | 21.7 | 21.7 |
| p1WH           | 23.8   | 24.2 | 24.6 | 19.4  | 19.4 | 19.4 | 21.8  | 22.4 | 23.0 | 20.3 | 20.4 | 20.5 |
| p21WH          | 24.3   | 24.7 | 25.0 | 21.5  | 21.5 | 21.5 | 21.7  | 22.3 | 22.9 | 20.6 | 20.9 | 21.2 |
| P7LA           | 26.2   | 26.2 | 26.2 | 20.4  | 20.4 | 20.4 | 22.2  | 22.2 | 22.2 | 20.4 | 20.4 | 20.4 |
| P7LV           | 32.8   | 33.1 | 33.4 | 27.9  | 29.0 | 30.0 | 29.2  | 30.1 | 31.1 | 31.6 | 31.9 | 32.2 |
| P7RA           | 27.7   | 27.7 | 27.7 | 21.7  | 21.7 | 21.7 | 24.0  | 24.0 | 24.0 | 25.0 | 25.0 | 25.0 |
| P7RV           | 26.6   | 26.6 | 26.6 | 21.4  | 21.4 | 21.4 | 23.1  | 23.1 | 23.1 | 21.3 | 21.3 | 21.3 |
| p7WH           | 24.3   | 24.6 | 24.9 | 20.3  | 20.3 | 20.3 | 21.7  | 22.3 | 22.9 | 20.7 | 20.8 | 20.9 |
| RVendoHETheart | 24.1   | 24.6 | 25.1 | 20.9  | 21.4 | 21.9 | 21.1  | 21.7 | 22.3 | 20.0 | 20.9 | 21.7 |
| RVendoWTheart  | 24.1   | 25.3 | 26.5 | 21.0  | 22.3 | 23.6 | 21.5  | 23.0 | 24.5 | 19.9 | 21.7 | 23.5 |
| RVepiHETheart  | 24.2   | 24.7 | 25.2 | 21.1  | 21.7 | 22.4 | 21.7  | 22.1 | 22.6 | 20.5 | 20.8 | 21.0 |
| RVepiWTheart   | 24.6   | 24.8 | 25.0 | 21.3  | 21.7 | 22.1 | 21.4  | 22.0 | 22.6 | 20.1 | 21.0 | 22.0 |
| RVOTHET        | 23.8   | 24.1 | 24.5 | 20.7  | 21.3 | 22.0 | 21.3  | 22.0 | 22.6 | 19.6 | 20.9 | 22.2 |
| RVOTWT         | 26.5   | 26.7 | 26.9 | 23.5  | 23.6 | 23.7 | 23.8  | 23.9 | 24.1 | 22.9 | 23.8 | 24.6 |
| Ventricles     | 25.1   | 25.3 | 25.5 | 22.0  | 22.0 | 22.0 | 22.1  | 22.7 | 23.2 | 21.5 | 21.7 | 21.9 |

Supplementary Table 1 (continued).

| Gene→          | Polr2a |      |      | Ppia |      |      | Rpl32 |      |      | Rpl4 |      |      | Tbp  |      |      |
|----------------|--------|------|------|------|------|------|-------|------|------|------|------|------|------|------|------|
| Tissue Type    | Min    | Mean | Max  | Min  | Mean | Max  | Min   | Mean | Max  | Min  | Mean | Max  | Min  | Mean | Max  |
| 14dBZ          | 25.6   | 26.2 | 27.2 | 19.2 | 19.9 | 20.4 | 18.8  | 19.4 | 20.4 | 19.9 | 20.0 | 20.2 | 26.1 | 26.3 | 26.7 |
| 14dIZ          | 29.0   | 29.0 | 29.0 | 20.9 | 20.9 | 20.9 | 20.2  | 20.2 | 20.2 | 24.3 | 24.3 | 24.3 | 29.5 | 29.5 | 29.5 |
| 3dBZ           | 25.5   | 26.3 | 26.9 | 18.8 | 19.4 | 19.9 | 18.5  | 19.1 | 19.8 | 19.6 | 19.9 | 20.2 | 26.2 | 26.8 | 27.4 |
| 3dIZ           | 29.1   | 29.1 | 29.1 | 20.9 | 20.9 | 20.9 | 20.4  | 20.4 | 20.4 | 22.0 | 22.0 | 22.0 | 29.0 | 29.0 | 29.0 |
| 7dIZ           | 26.7   | 26.7 | 26.7 | 19.0 | 19.0 | 19.0 | 18.6  | 18.6 | 18.6 | 19.9 | 19.9 | 19.9 | 26.9 | 26.9 | 26.9 |
| AdultLA        | 31.3   | 31.3 | 31.3 | 20.0 | 20.2 | 20.4 | 19.7  | 19.8 | 19.8 | 22.2 | 22.4 | 22.6 | 29.3 | 29.3 | 29.4 |
| AdultLV        | 23.4   | 24.7 | 25.5 | 17.0 | 18.1 | 19.6 | 16.0  | 20.0 | 31.1 | 17.1 | 20.5 | 29.9 | 24.7 | 25.9 | 27.0 |
| AdultRA        | 33.6   | 33.6 | 33.6 | 20.8 | 21.9 | 22.9 | 20.3  | 21.1 | 21.9 | 23.3 | 24.7 | 26.1 | 31.1 | 33.5 | 35.3 |
| AdultWH        | 32.2   | 33.6 | 35.8 | 21.9 | 22.9 | 24.2 | 21.9  | 22.6 | 23.7 | 24.2 | 25.2 | 26.2 | 31.1 | 32.4 | 33.7 |
| Atria          | 24.7   | 24.7 | 24.7 | 17.5 | 17.8 | 18.2 | 17.4  | 17.7 | 17.9 | 18.3 | 18.5 | 18.7 | 24.1 | 24.1 | 24.1 |
| e10            | 28.2   | 28.2 | 28.2 | 19.1 | 19.6 | 20.2 | 19.4  | 19.5 | 19.7 | 20.5 | 20.9 | 21.2 | 27.6 | 27.6 | 27.6 |
| e11            | 27.6   | 29.0 | 30.5 | 19.0 | 20.0 | 21.0 | 19.2  | 19.2 | 19.2 | 20.6 | 20.6 | 20.7 | 27.4 | 28.7 | 30.1 |
| e12            | 26.1   | 26.1 | 26.1 | 17.3 | 17.6 | 17.9 | 17.6  | 17.8 | 18.1 | 18.9 | 19.1 | 19.3 | 25.6 | 25.6 | 25.6 |
| e14            | 25.8   | 25.8 | 25.8 | 16.8 | 17.2 | 17.6 | 17.1  | 17.5 | 17.8 | 18.4 | 18.8 | 19.2 | 25.1 | 25.1 | 25.1 |
| e15            | 30.7   | 32.8 | 35.0 | 28.2 | 28.3 | 28.4 | 29.0  | 29.2 | 29.4 | 32.4 | 32.4 | 32.5 | 34.5 | 34.5 | 34.5 |
| e16            | 32.2   | 32.3 | 32.5 | 23.3 | 23.7 | 24.4 | 23.5  | 23.8 | 24.1 | 25.1 | 25.7 | 26.4 | 32.1 | 33.7 | 34.7 |
| e17            | 27.3   | 27.3 | 27.3 | 20.9 | 20.9 | 20.9 | 20.5  | 20.5 | 20.5 | 21.9 | 21.9 | 21.9 | 28.8 | 28.8 | 28.8 |
| e18            | 24.4   | 24.4 | 24.4 | 16.9 | 17.1 | 17.4 | 17.5  | 17.7 | 17.9 | 18.4 | 18.7 | 19.0 | 24.8 | 24.8 | 24.8 |
| HL1            | 25.3   | 25.4 | 25.6 | 20.4 | 20.4 | 20.4 | 20.5  | 20.5 | 20.5 | 21.5 | 21.6 | 21.8 | 26.3 | 27.1 | 27.9 |
| HL1Bmp         | 24.8   | 25.1 | 25.4 | 19.7 | 20.1 | 20.5 | 19.9  | 19.9 | 19.9 | 21.1 | 21.2 | 21.3 | 26.2 | 27.3 | 28.4 |
| HL1Tsa         | 26.1   | 26.1 | 26.1 | 20.9 | 20.9 | 20.9 | 20.9  | 20.9 | 20.9 | 22.1 | 22.1 | 22.1 | 26.5 | 26.5 | 26.5 |
| LVendoHETheart | 24.4   | 24.6 | 24.8 | 18.5 | 19.1 | 19.7 | 18.5  | 18.8 | 19.2 | 18.8 | 19.3 | 19.8 | 25.2 | 25.3 | 25.3 |
| LVendoWTheart  | 24.1   | 25.5 | 27.0 | 18.6 | 19.7 | 20.8 | 18.2  | 19.3 | 20.4 | 18.6 | 19.7 | 20.9 | 24.4 | 25.9 | 27.5 |
| LVepiHETheart  | 25.1   | 25.2 | 25.2 | 18.9 | 19.0 | 19.2 | 18.0  | 18.5 | 19.0 | 18.5 | 19.0 | 19.5 | 24.9 | 25.1 | 25.2 |
| LVepiWTheart   | 23.8   | 24.2 | 24.6 | 18.3 | 18.8 | 19.3 | 17.7  | 18.3 | 18.8 | 18.1 | 18.7 | 19.4 | 24.7 | 24.8 | 25.0 |
| LVmiSham       | 23.7   | 23.8 | 23.8 | 18.9 | 18.9 | 19.0 | 18.3  | 18.5 | 18.7 | 18.7 | 18.7 | 18.7 | 24.8 | 25.0 | 25.2 |
| LVtac          | 25.5   | 25.7 | 25.9 | 19.6 | 19.8 | 20.1 | 18.9  | 19.4 | 19.9 | 19.7 | 19.8 | 19.9 | 26.0 | 26.1 | 26.3 |
| LVtrans        | 26.6   | 26.7 | 26.9 | 20.5 | 20.6 | 20.7 | 19.3  | 19.6 | 19.9 | 20.3 | 20.4 | 20.4 | 26.3 | 26.4 | 26.5 |
| p14WH          | 26.8   | 26.8 | 26.8 | 19.7 | 19.9 | 20.2 | 19.2  | 19.4 | 19.6 | 19.9 | 20.2 | 20.5 | 26.3 | 26.3 | 26.3 |
| P1LA           | 26.1   | 26.1 | 26.1 | 17.1 | 17.1 | 17.1 | 17.6  | 17.6 | 17.6 | 18.9 | 18.9 | 18.9 | 25.8 | 25.8 | 25.8 |
| P1LV           | 31.2   | 31.2 | 31.2 | 21.0 | 21.0 | 21.0 | 21.5  | 21.5 | 21.5 | 22.8 | 22.8 | 22.8 | 30.9 | 30.9 | 30.9 |
| P1RA           | 28.9   | 28.9 | 28.9 | 18.7 | 18.7 | 18.7 | 19.4  | 19.4 | 19.4 | 20.6 | 20.6 | 20.6 | 27.5 | 27.5 | 27.5 |
| P1RV           | 26.4   | 26.4 | 26.4 | 18.7 | 18.7 | 18.7 | 19.1  | 19.1 | 19.1 | 20.7 | 20.7 | 20.7 | 27.0 | 27.0 | 27.0 |
| p1WH           | 24.5   | 24.5 | 24.5 | 17.1 | 17.4 | 17.7 | 17.8  | 18.0 | 18.1 | 19.0 | 19.2 | 19.4 | 24.6 | 24.6 | 24.6 |
| p21WH          | 25.2   | 25.2 | 25.2 | 19.3 | 19.5 | 19.6 | 18.7  | 18.8 | 18.9 | 19.3 | 19.5 | 19.8 | 25.3 | 25.3 | 25.3 |
| P7LA           | 24.9   | 24.9 | 24.9 | 17.3 | 17.3 | 17.3 | 17.5  | 17.5 | 17.5 | 18.7 | 18.7 | 18.7 | 25.5 | 25.5 | 25.5 |
| P7LV           | 36.4   | 36.4 | 36.4 | 24.1 | 24.7 | 25.4 | 24.2  | 24.3 | 24.4 | 26.6 | 27.3 | 27.9 | 32.9 | 34.0 | 35.1 |
| P7RA           | 28.0   | 28.0 | 28.0 | 19.1 | 19.1 | 19.1 | 19.6  | 19.6 | 19.6 | 21.3 | 21.3 | 21.3 | 27.8 | 27.8 | 27.8 |
| P7RV           | 25.1   | 25.1 | 25.1 | 18.5 | 18.5 | 18.5 | 19.2  | 19.2 | 19.2 | 19.5 | 19.5 | 19.5 | 26.6 | 26.6 | 26.6 |
| p7WH           | 24.5   | 24.5 | 24.5 | 17.7 | 18.0 | 18.3 | 17.9  | 18.1 | 18.3 | 18.8 | 19.2 | 19.5 | 24.7 | 24.7 | 24.7 |
| RVendoHETheart | 24.7   | 25.1 | 25.5 | 18.5 | 19.2 | 19.8 | 18.2  | 18.8 | 19.4 | 18.3 | 19.1 | 20.0 | 24.7 | 25.2 | 25.8 |
| RVendoWTheart  | 24.0   | 25.0 | 25.9 | 18.3 | 20.0 | 21.7 | 17.8  | 19.3 | 20.8 | 18.0 | 19.8 | 21.6 | 24.3 | 25.9 | 27.5 |
| RVepiHETheart  | 24.3   | 25.5 | 26.7 | 19.0 | 19.3 | 19.7 | 18.6  | 18.6 | 18.6 | 19.3 | 19.3 | 19.4 | 24.9 | 25.1 | 25.3 |
| RVepiWTheart   | 24.0   | 24.7 | 25.3 | 18.6 | 19.1 | 19.6 | 18.2  | 18.6 | 19.1 | 18.5 | 19.3 | 20.0 | 25.4 | 25.4 | 25.4 |
| RVOTHET        | 24.8   | 25.0 | 25.2 | 18.0 | 18.9 | 19.9 | 17.9  | 18.5 | 19.2 | 18.3 | 19.1 | 20.0 | 24.7 | 25.2 | 25.7 |
| RVOTWT         | 26.4   | 26.7 | 27.1 | 20.8 | 21.2 | 21.6 | 20.1  | 20.3 | 20.5 | 20.8 | 21.2 | 21.6 | 27.2 | 27.2 | 27.3 |
| Ventricles     | 26.2   | 26.2 | 26.2 | 19.6 | 19.9 | 20.1 | 18.8  | 19.1 | 19.3 | 19.6 | 19.9 | 20.2 | 26.6 | 26.6 | 26.6 |

**Supplementary Table 2**

Overview of tissues samples per tissue type and category. For each category the included tissue types and number of tissue samples (N) per type are given. The number of qPCR reactions per tissue type (N) are specified per candidate reference gene. In the analysis, the reactions per gene and tissue type are treated as technical replicates.

| category                     | tissue type                        | samples per type (N) | reactions (N) | reactions per gene |       |       |      |        |      |       |      |     |   |
|------------------------------|------------------------------------|----------------------|---------------|--------------------|-------|-------|------|--------|------|-------|------|-----|---|
|                              |                                    |                      |               | Eef1e1             | H2afz | Hprt1 | Pgk1 | Poli2a | Ppia | Rpl32 | Rpl4 | Tbp |   |
| embryonic stages whole heart | e10.5                              | 4                    | 15            | 2                  | 1     | 2     | 2    | 1      | 2    | 2     | 2    | 2   | 1 |
|                              | e11.5                              | 5                    | 18            | 2                  | 2     | 2     | 2    | 2      | 2    | 2     | 2    | 2   | 2 |
|                              | e12.5                              | 4                    | 15            | 2                  | 1     | 2     | 2    | 1      | 2    | 2     | 2    | 2   | 1 |
|                              | e14.5                              | 4                    | 15            | 2                  | 1     | 2     | 2    | 1      | 2    | 2     | 2    | 2   | 1 |
|                              | e15.5                              | 2                    | 15            | 1                  | 1     | 2     | 2    | 2      | 2    | 2     | 2    | 2   | 1 |
|                              | e16.5                              | 3                    | 25            | 3                  | 2     | 3     | 3    | 2      | 3    | 3     | 3    | 3   | 3 |
|                              | e17.5                              | 2                    | 9             | 1                  | 1     | 1     | 1    | 1      | 1    | 1     | 1    | 1   | 1 |
|                              | e18.5                              | 4                    | 14            | 1                  | 1     | 2     | 2    | 1      | 2    | 2     | 2    | 2   | 1 |
| early postnatal whole heart  | p1 WH                              | 4                    | 15            | 2                  | 1     | 2     | 2    | 1      | 2    | 2     | 2    | 2   | 1 |
|                              | p7 WH                              | 4                    | 15            | 2                  | 1     | 2     | 2    | 1      | 2    | 2     | 2    | 2   | 1 |
| early postnatal ventricles   | P1 LV                              | 1                    | 9             | 1                  | 1     | 1     | 1    | 1      | 1    | 1     | 1    | 1   | 1 |
|                              | P1 RV                              | 1                    | 9             | 1                  | 1     | 1     | 1    | 1      | 1    | 1     | 1    | 1   | 1 |
|                              | P7 LV                              | 1                    | 19            | 2                  | 2     | 3     | 2    | 1      | 2    | 2     | 2    | 3   | 3 |
|                              | P7 RV                              | 1                    | 9             | 1                  | 1     | 1     | 1    | 1      | 1    | 1     | 1    | 1   | 1 |
| early postnatal atria        | P1 LA                              | 1                    | 9             | 1                  | 1     | 1     | 1    | 1      | 1    | 1     | 1    | 1   | 1 |
|                              | P1 RA                              | 2                    | 9             | 1                  | 1     | 1     | 1    | 1      | 1    | 1     | 1    | 1   | 1 |
|                              | P7 LA                              | 1                    | 9             | 1                  | 1     | 1     | 1    | 1      | 1    | 1     | 1    | 1   | 1 |
|                              | P7 RA                              | 1                    | 9             | 1                  | 1     | 1     | 1    | 1      | 1    | 1     | 1    | 1   | 1 |
| late postnatal whole heart   | p14 WH                             | 4                    | 15            | 2                  | 1     | 2     | 2    | 1      | 2    | 2     | 2    | 2   | 1 |
|                              | p21 WH                             | 4                    | 15            | 2                  | 1     | 2     | 2    | 1      | 2    | 2     | 2    | 2   | 1 |
| adult whole heart            | Adult WH                           | 5                    | 44            | 5                  | 4     | 5     | 5    | 5      | 5    | 5     | 5    | 5   | 5 |
| adult ventricles             | Ventricles                         | 2                    | 15            | 2                  | 1     | 2     | 2    | 1      | 2    | 2     | 2    | 2   | 1 |
|                              | Adult LV                           | 2                    | 39            | 5                  | 4     | 4     | 4    | 4      | 4    | 5     | 5    | 5   | 4 |
|                              | LV endo WT                         | 1                    | 18            | 2                  | 2     | 2     | 2    | 2      | 2    | 2     | 2    | 2   | 2 |
|                              | LV endo HET                        | 1                    | 18            | 2                  | 2     | 2     | 2    | 2      | 2    | 2     | 2    | 2   | 2 |
|                              | LV epi WT                          | 1                    | 18            | 2                  | 2     | 2     | 2    | 2      | 2    | 2     | 2    | 2   | 2 |
|                              | LV epi HET                         | 1                    | 18            | 2                  | 2     | 2     | 2    | 2      | 2    | 2     | 2    | 2   | 2 |
|                              | RV endo WT                         | 1                    | 18            | 2                  | 2     | 2     | 2    | 2      | 2    | 2     | 2    | 2   | 2 |
|                              | RV endo HET                        | 1                    | 18            | 2                  | 2     | 2     | 2    | 2      | 2    | 2     | 2    | 2   | 2 |
|                              | RV epi WT                          | 1                    | 18            | 2                  | 2     | 2     | 2    | 2      | 2    | 2     | 2    | 2   | 2 |
|                              | RV epi HET                         | 1                    | 18            | 2                  | 2     | 2     | 2    | 2      | 2    | 2     | 2    | 2   | 2 |
|                              | RVOT WT                            | 1                    | 18            | 2                  | 2     | 2     | 2    | 2      | 2    | 2     | 2    | 2   | 2 |
|                              | RVOT HET                           | 1                    | 18            | 2                  | 2     | 2     | 2    | 2      | 2    | 2     | 2    | 2   | 2 |
|                              | adult ventricular cardiomyopathies | LV Sham MI           | 2             | 18                 | 2     | 2     | 2    | 2      | 2    | 2     | 2    | 2   | 2 |
| 3dpi BZ                      |                                    | 6                    | 36            | 4                  | 4     | 4     | 4    | 4      | 4    | 4     | 4    | 4   | 4 |
| 3dpi IZ                      |                                    | 2                    | 9             | 1                  | 1     | 1     | 1    | 1      | 1    | 1     | 1    | 1   | 1 |
| 7dpi IZ                      |                                    | 2                    | 9             | 1                  | 1     | 1     | 1    | 1      | 1    | 1     | 1    | 1   | 1 |
| 14dpi BZ                     |                                    | 8                    | 63            | 7                  | 7     | 7     | 7    | 7      | 7    | 7     | 7    | 7   | 7 |
| 14dpi IZ                     |                                    | 2                    | 8             | 1                  | 1     | 1     | 0    | 1      | 1    | 1     | 1    | 1   | 1 |
| LV Sham TAC                  |                                    | 2                    | 18            | 2                  | 2     | 2     | 2    | 2      | 2    | 2     | 2    | 2   | 2 |
| LV TAC                       | 3                                  | 54                   | 6             | 6                  | 6     | 6     | 6    | 6      | 6    | 6     | 6    | 6   |   |
| adult atria                  | Atria                              | 2                    | 13            | 2                  | 0     | 1     | 2    | 1      | 2    | 2     | 2    | 2   | 1 |
|                              | Adult LA                           | 2                    | 16            | 2                  | 2     | 2     | 1    | 1      | 2    | 2     | 2    | 2   | 2 |
|                              | Adult RA                           | 2                    | 19            | 3                  | 2     | 2     | 2    | 1      | 2    | 2     | 2    | 3   | 3 |
| cell lines                   | HL1                                | 2                    | 18            | 2                  | 2     | 2     | 2    | 2      | 2    | 2     | 2    | 2   |   |
| in vitro experiments         | HL1 Bmp                            | 2                    | 18            | 2                  | 2     | 2     | 2    | 2      | 2    | 2     | 2    | 2   | 2 |
|                              | HL1 Tsa                            | 1                    | 9             | 1                  | 1     | 1     | 1    | 1      | 1    | 1     | 1    | 1   | 1 |

**Abbreviations**

**Heart parts:** WH = whole heart / LA = left atrium / RA = right atrium / LV = left ventricle / RV = right ventricle / epi = epicardium and external myocardium / endo = endocardium and internal myocardium / RVOT = right ventricular outflow tract

**Stages:** e = embryonic day / p = postnatal / dpi = days post-infarction

**Treatments:** Sham = sham / MI = myocardial infarction / BZ = border zone / IZ = infarct zone / TAC = Transverse Aortic Constriction / Bmp = bone morphogenetic protein / TSA = Trichostatin A

**Supplementary Table 3.**

PCR efficiency of the different genes that were considered as candidate reference genes.

An efficiency of 2 means a doubling per cycle or a 100% efficient PCR. N indicates the number of amplification curves used to determine the PCR efficiency. SEM = standard error of the mean; RSE = relative SE calculated as SEM/efficiency.

## Reference gene candidates

|        | PCR Efficiency | SEM    | RSE    | N   |
|--------|----------------|--------|--------|-----|
| Eef1e1 | 1.887          | 0.0045 | 0.0024 | 99  |
| H2afz  | 1.879          | 0.0043 | 0.0023 | 85  |
| Hprt1  | 1.906          | 0.0038 | 0.0020 | 99  |
| Pgk1   | 1.891          | 0.0048 | 0.0026 | 97  |
| Ppia   | 1.905          | 0.0044 | 0.0023 | 99  |
| Polr2a | 1.887          | 0.0045 | 0.0024 | 85  |
| Rpl32  | 1.904          | 0.0042 | 0.0022 | 100 |
| Rpl4   | 1.907          | 0.0043 | 0.0023 | 100 |
| Tbp    | 1.872          | 0.0034 | 0.0018 | 90  |

## Validation experiment

|       | PCR Efficiency | SEM    | RSE    | N  |
|-------|----------------|--------|--------|----|
| Bact  | 1.832          | 0.0050 | 0.0027 | 26 |
| GAPDH | 1.878          | 0.0056 | 0.0030 | 26 |
| Fstl1 | 1.839          | 0.0051 | 0.0028 | 49 |
| Fstl5 | 1.898          | 0.0050 | 0.0026 | 25 |

## Legends

### Supplemental Figure 1

Electrophoresis gel showing the products of a qPCR run with different primer sets and input murine gDNA, cDNA, -RT and NTC without DNase treatment. The expected bands are shown in the cDNA lanes, the pseudogenes are clearly visible in the gDNA lanes except for Eef1e1, Tbp and Polr2a. The -RT lanes show in most cases a band on the position of the band in the cDNA lanes, which shows the necessity of a DNase treatment. The NTC lanes show no products. In between every primer pair there is a pBluescript Msp1 marker for reference of the expected product size. The primers for Actb were discarded because of this analysis. Abbreviations: gDNA = genomic DNA; cDNA = copy DNA; -RT = cDNA synthesis reaction without reverse transcriptase; NTC = no tissue control (Water)

### Supplemental Figure 2.

M and V graphs. M-values (indicating gene stability) and V-values (indicating the required number of genes) are given for each of the experimental designs. See Table 3 in the text for the tissue types that are included in the experimental design. Per condition, the candidate reference genes are ranked on stability (M-value). A V-value below 0.15 (red line) indicates a sufficiently stable subset of reference genes.

### Supplemental. Figure 3.

**Effects of an incorrect normalization strategy on observed Fstl1 expression.** (A) Expression in whole heart during development (embryonic day 10.5 and 14.5, postnatal day 7 and adult mouse) using Eef1e1 and Rpl4 as reference genes for normalization (compare to Figure 1A). (B) Expression in left ventricle in normal condition or at different days after myocardial infarction (MI) using Ppia and Rpl32 as reference genes for normalization (compare to figure 1C). The normalized Follistatin-like 1 expression differs significantly between groups (one-way ANOVA). The insets show the result of the subsequent multiple comparison between groups. Grey boxes indicate subsets of groups with absence of evidence for differential expression ( $p$ -value  $< 0.05$ ) according the Student-Newman-Keuls test.

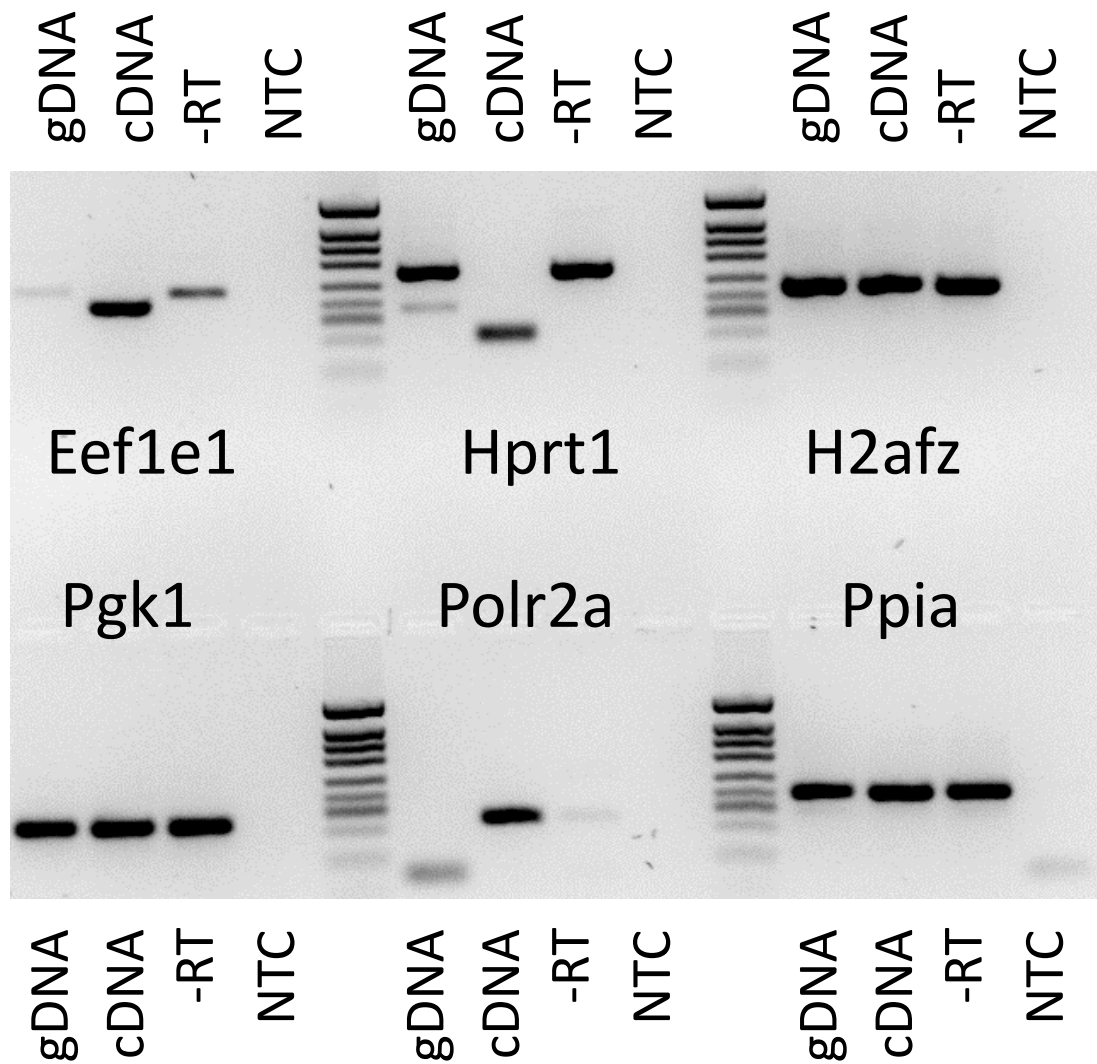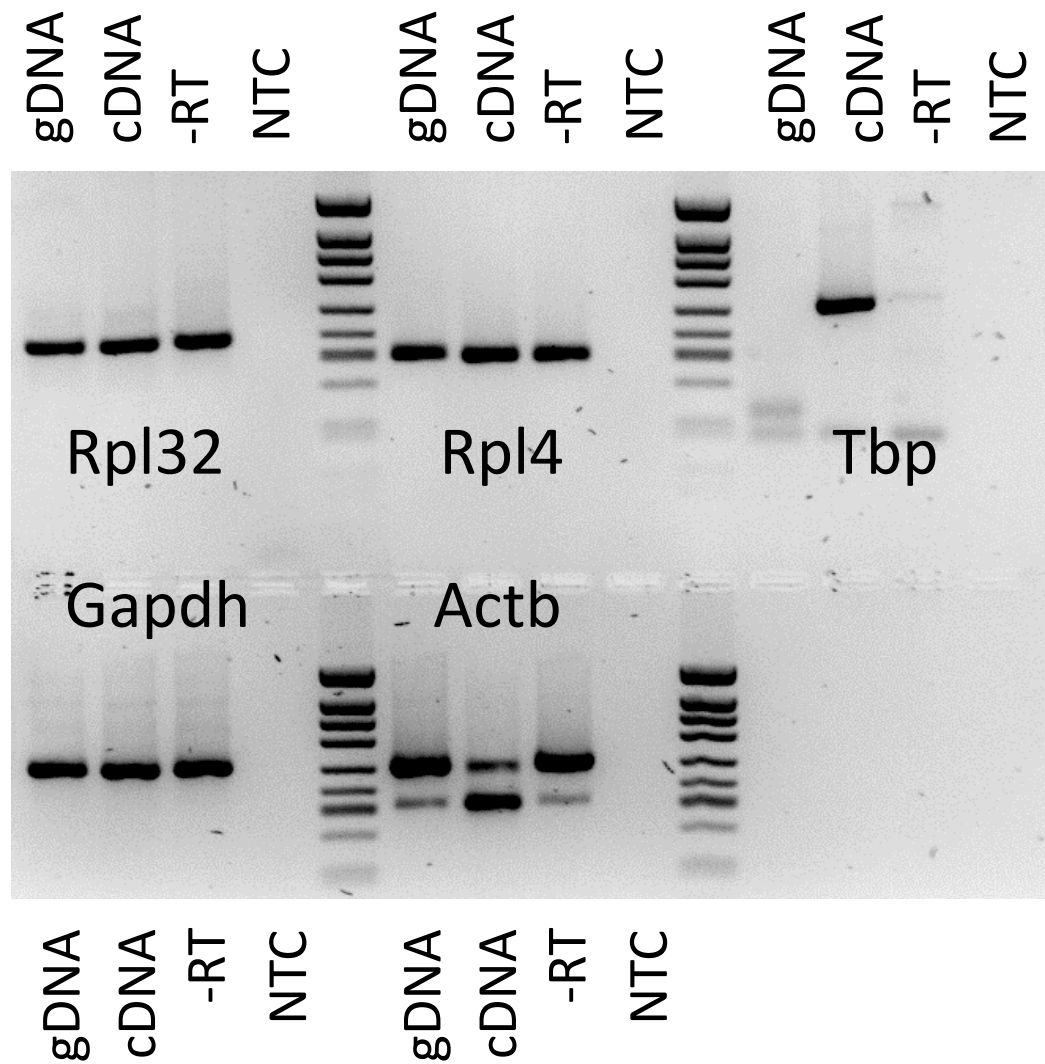

### all conditions

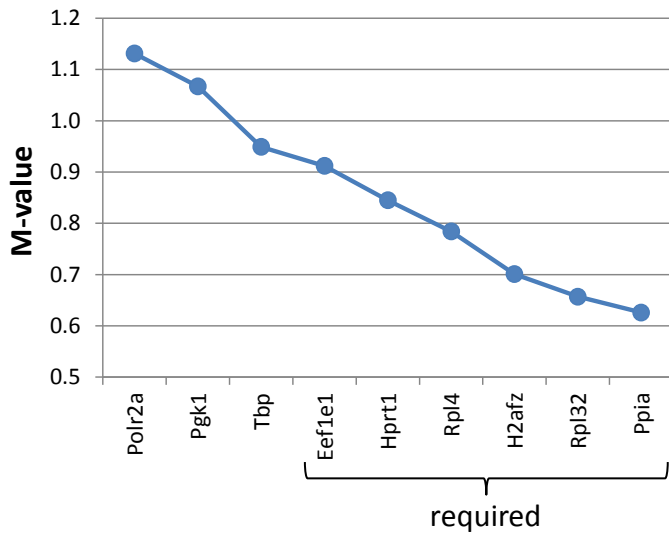

### Supplemental Figure 2

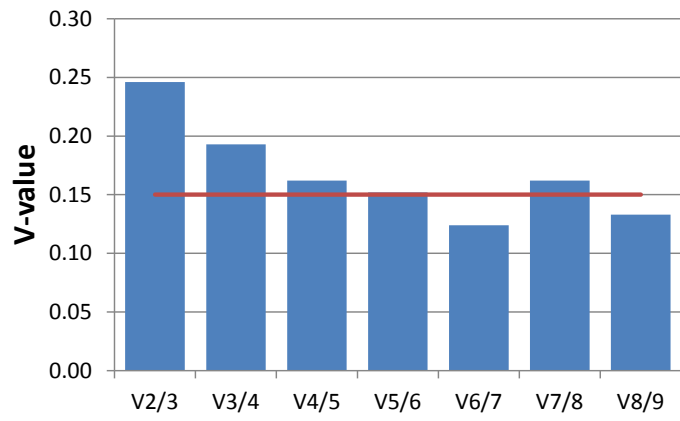

### prenatal development

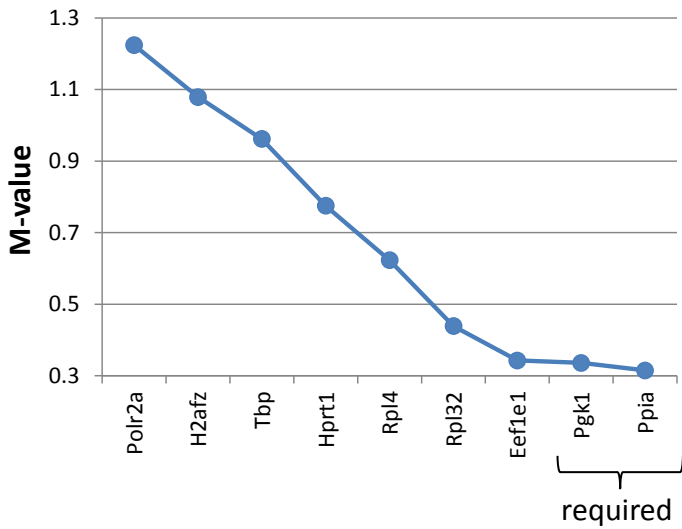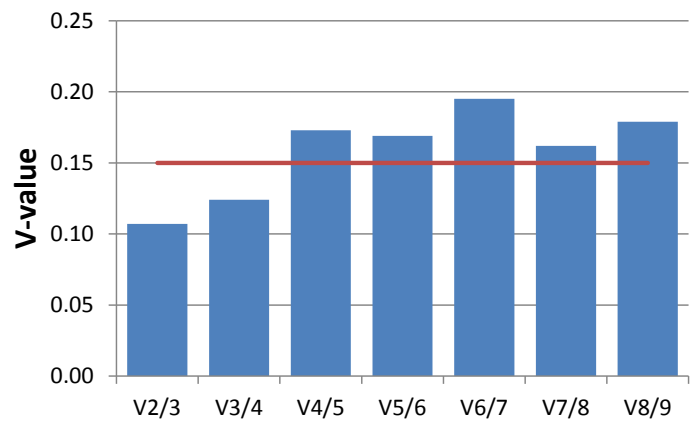

### prenatal till weaning

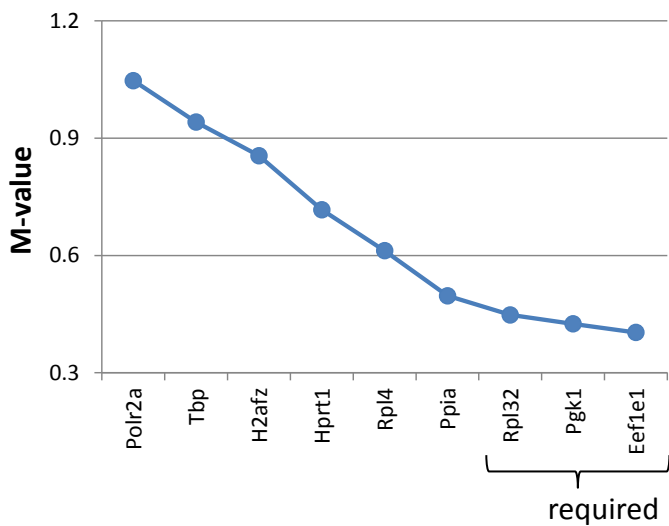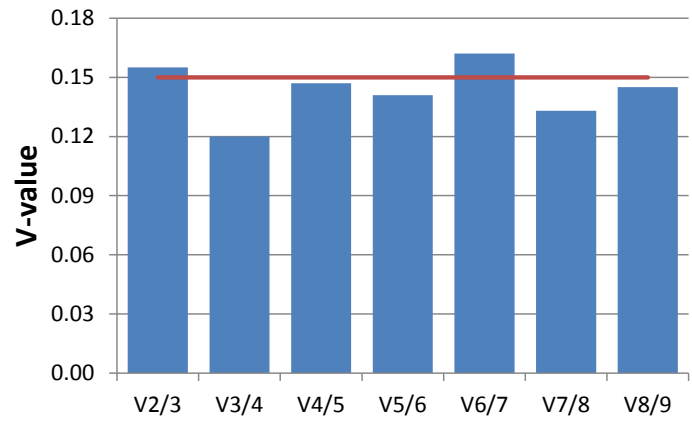



# Supplemental Figure 2 (cont'd)

## prenatal till adult

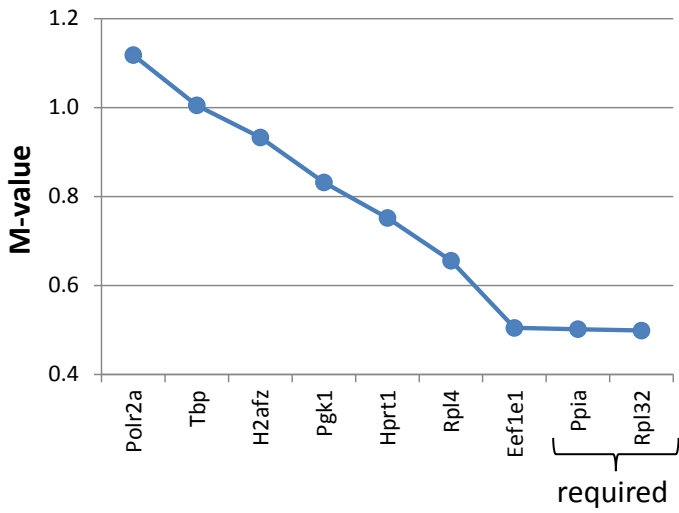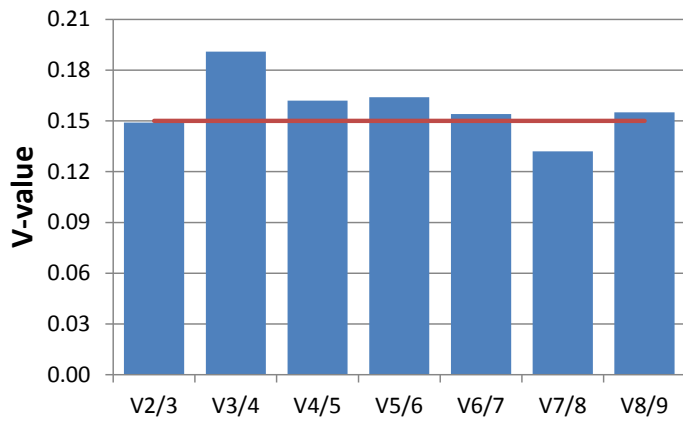

## weaning till adult

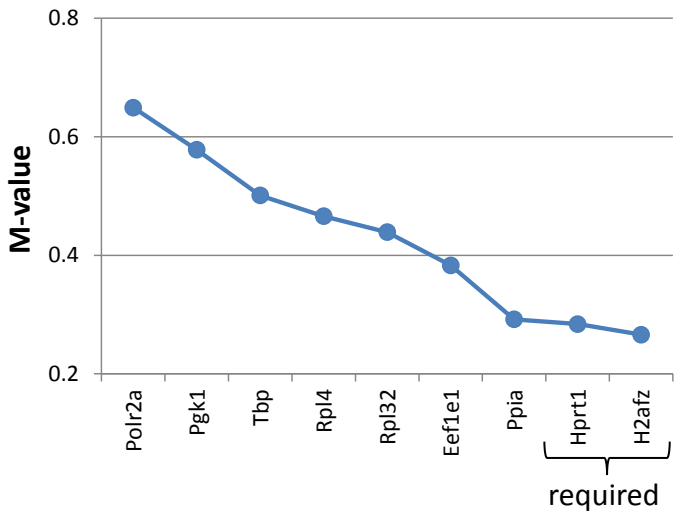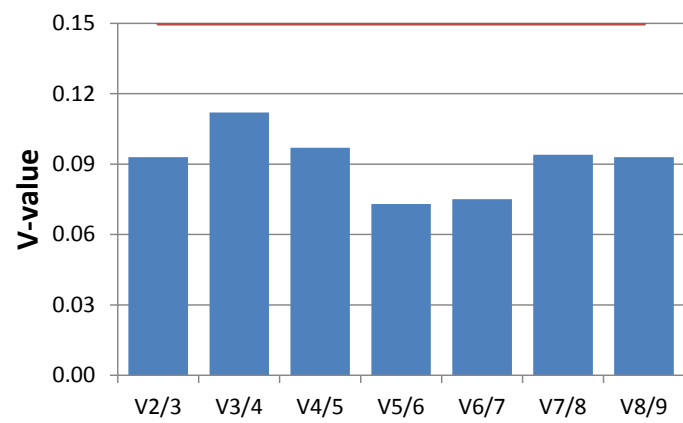

## adult

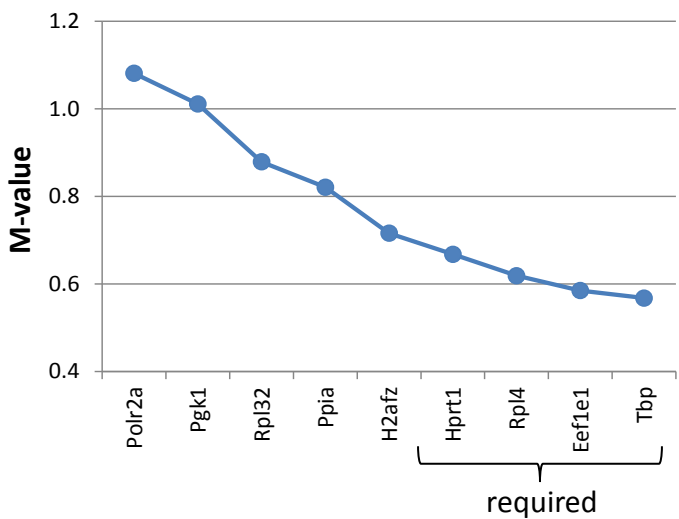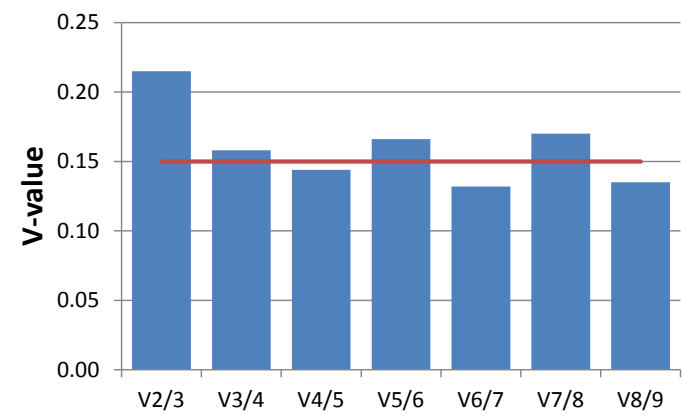

### postnatal development

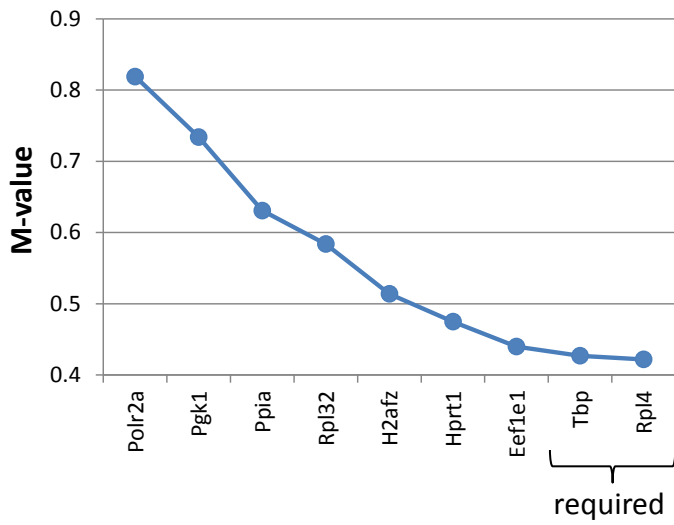

### Supplemental Figure 2 (cont'd)

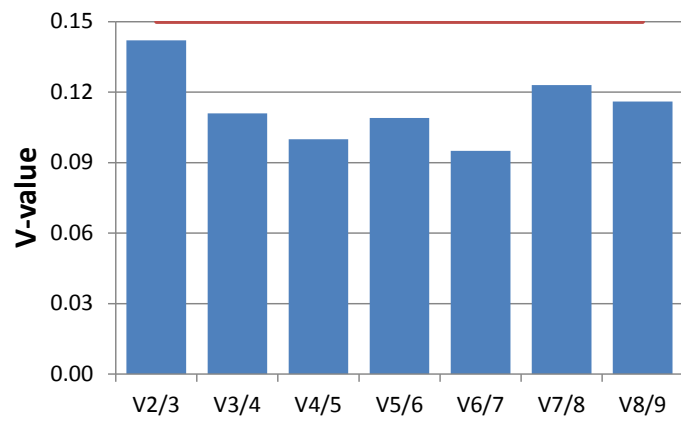

### postnatal + pathologies

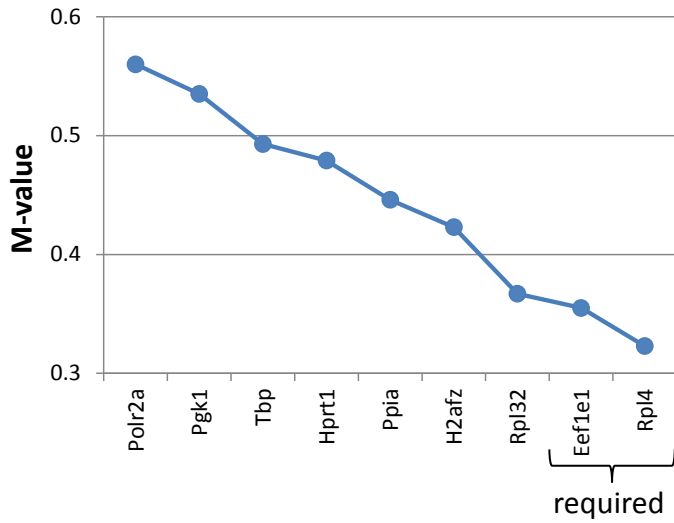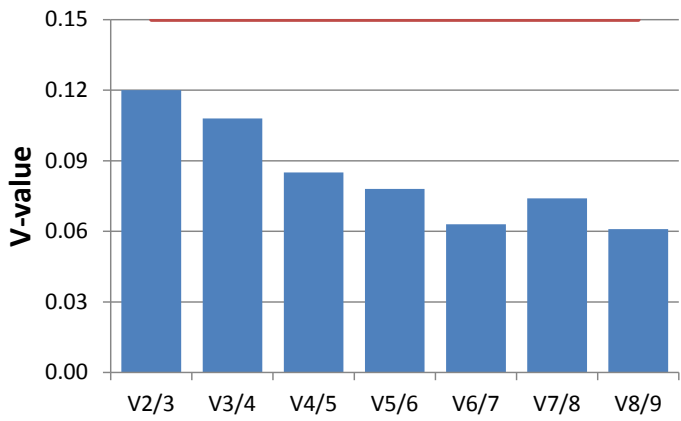

### adult + pathologies

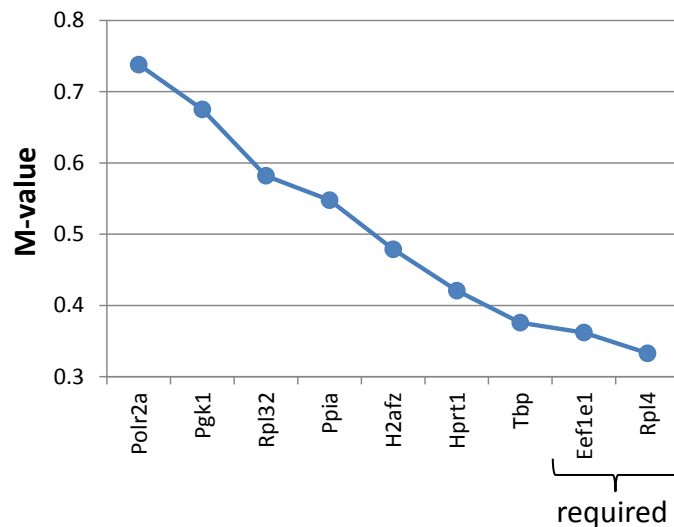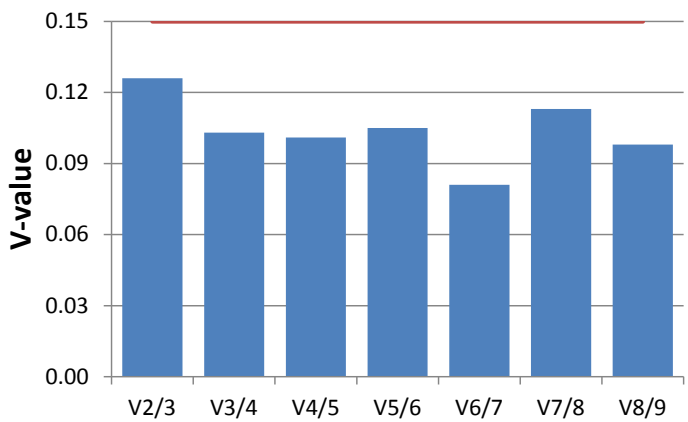

**HL1 + ventricles**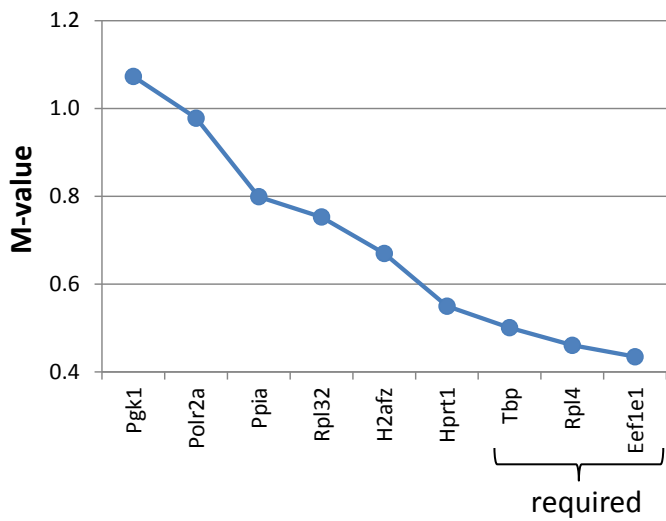**Supplemental Figure 2 (cont'd)**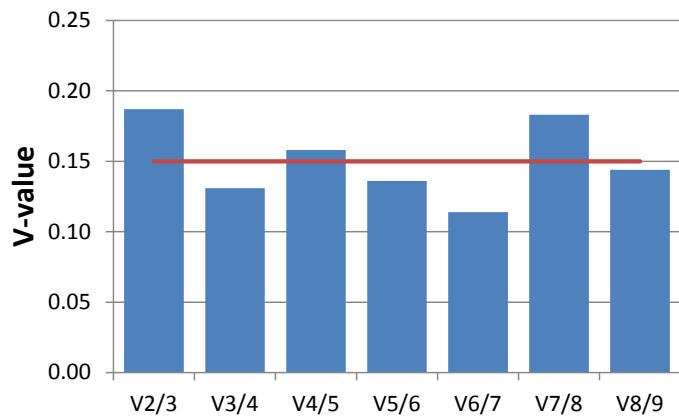**HL1 + atria**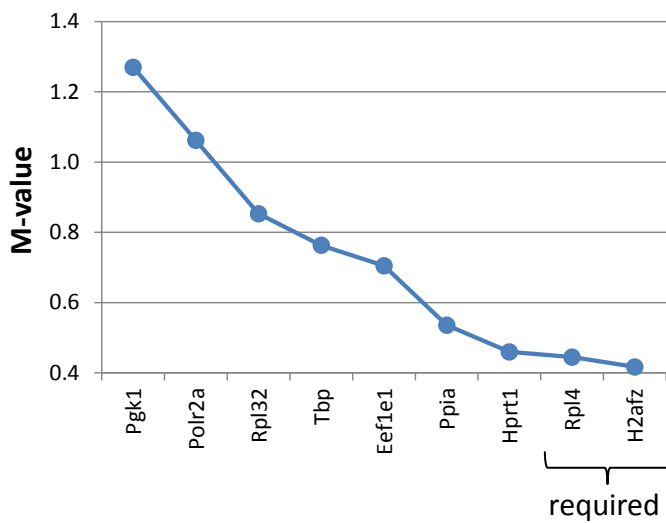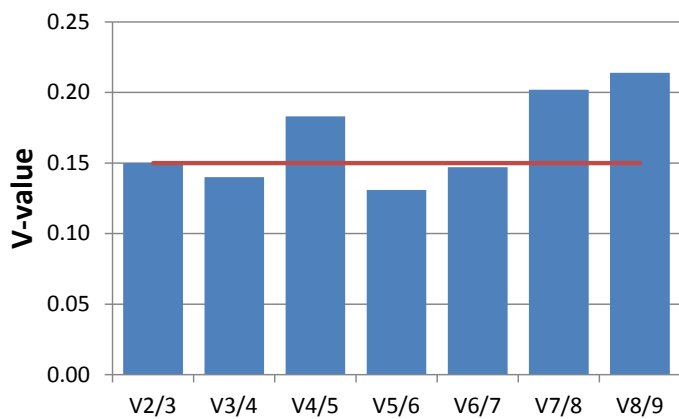**HL1 + treatment**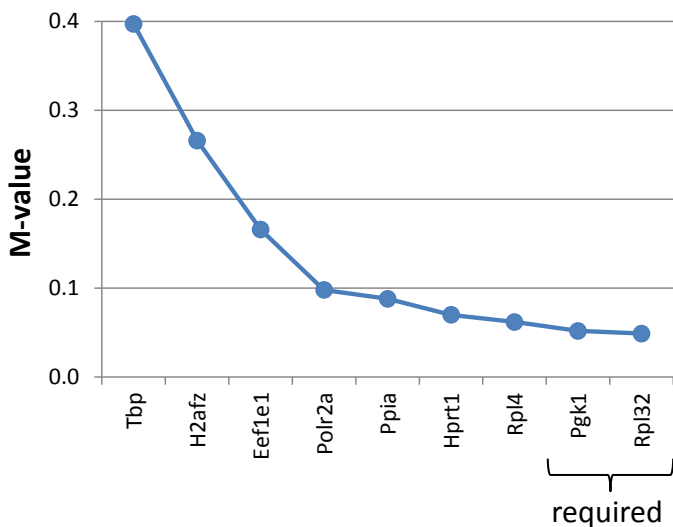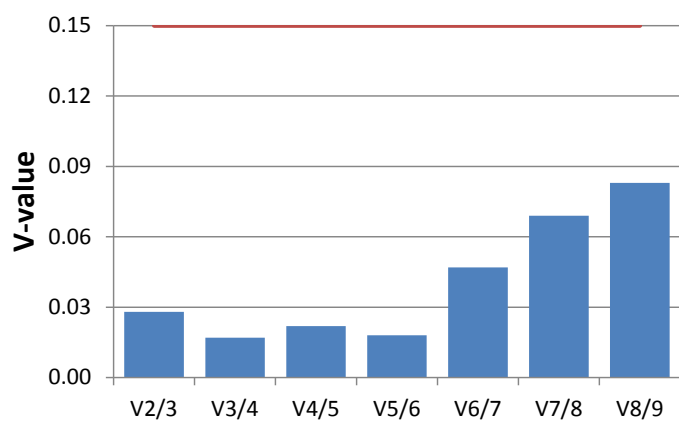

### Supplemental Figure 3.

Observed *Fstl1* expression after normalizations with the wrong set of reference genes

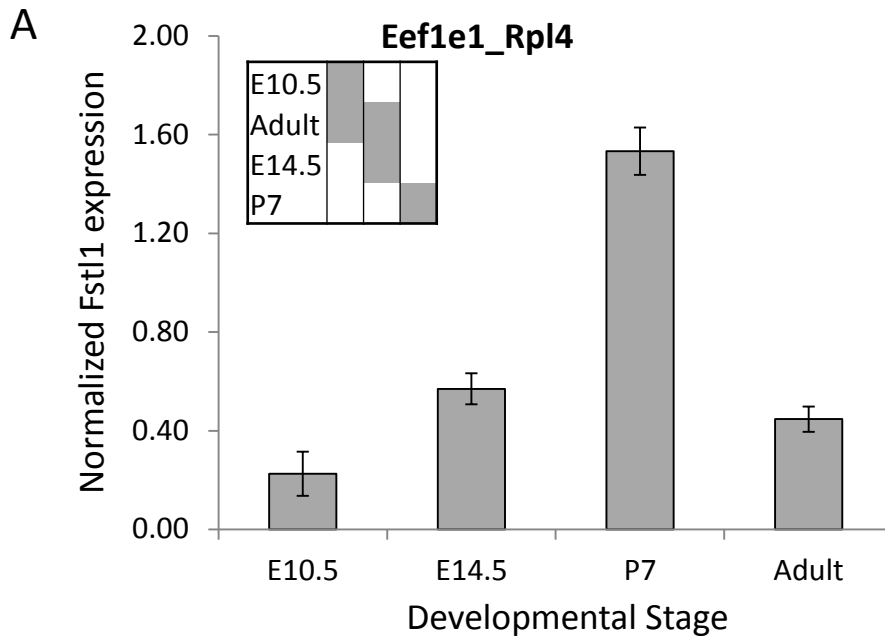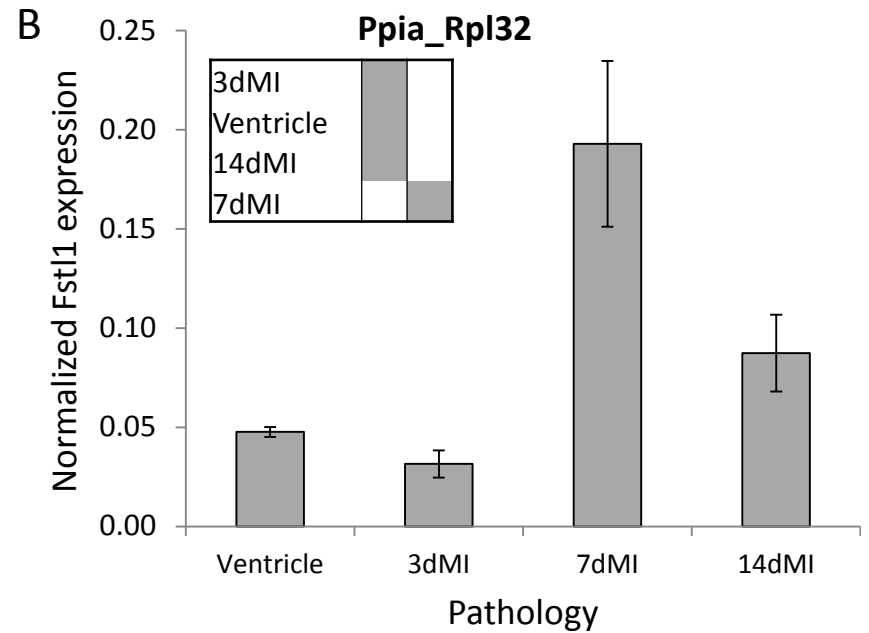

Supplement: 41598_2017_43_MOESM1_ESM.pdf [file 41598_2017_43_MOESM1_ESM.pdf]
